# Supplementary material
Source: HighWire-hosted journal article supplement (https://ez-admanager.com/highwire/filestream/136187/field_highwire_adjunct_files/0/Figure_e-1_LK.pdf)
Supplement: Figure_e-1_LK.pdf [file Figure_e-1_LK.pdf]

**Figure e-1. Assessments in the BENEFIT 11 trial**

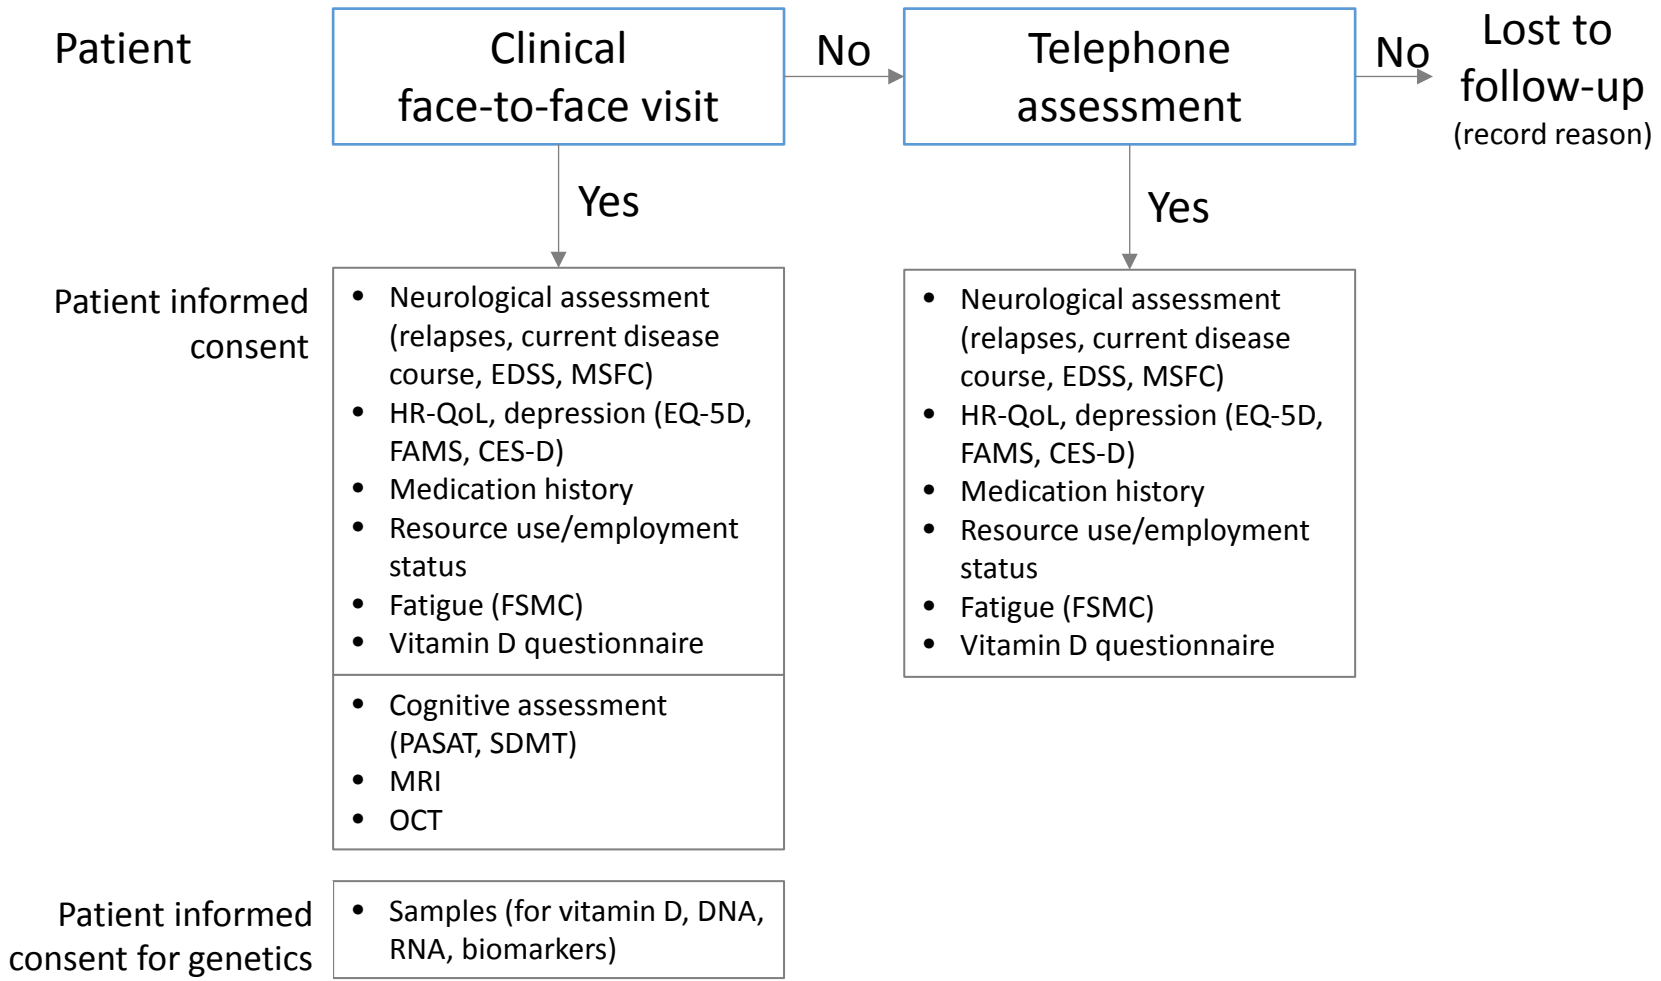

CES-D, Center for Epidemiological Studies Depression Scale; EQ-5D, EuroQuol 5-Dimension; FAMS, Functional Assessment of MS; FSMC, Fatigue Scale for Motor and Cognitive fatigue; HR-QoL, health-related quality of life; MRI, magnetic resonance imaging, OCT, optical coherence tomography; PASAT, Paced Auditory Serial Addition Task; SDMT, Symbol Digit Modalities Test.
